# Supplementary material for: Convenient and sensitive colorimetric detection of melamine in dairy products based on Cu(ii)-H2O2-3,3′,5,5′-tetramethylbenzidine system
Source: Royal Society of Chemistry journal article supplement (doi:10.1039/c8ra07167e), 2018-01-01
Supplement: c8ra07167e1.pdf [file c8ra07167e1.pdf]

***Electronic Supplementary Information***

**Convenient and sensitive colorimetric detection of melamine in dairy products  
based on Cu(II)-H<sub>2</sub>O<sub>2</sub>-3,3',5,5'-tetramethylbenzidine system**

Xue Han, Zhixin Qin, Mengyao Zhao, Jiajia Song, Fei Qu, Fengli Qu, Rong-Mei  
Kong\*

*College of Chemistry and Chemical Engineering, Qufu Normal University, Qufu  
Shandong 273165, P. R. China.*

\* To whom correspondence should be addressed.

E-mail: [kongrongmei@126.com](mailto:kongrongmei@126.com)

Tel/fax: (+86) 537-4456301

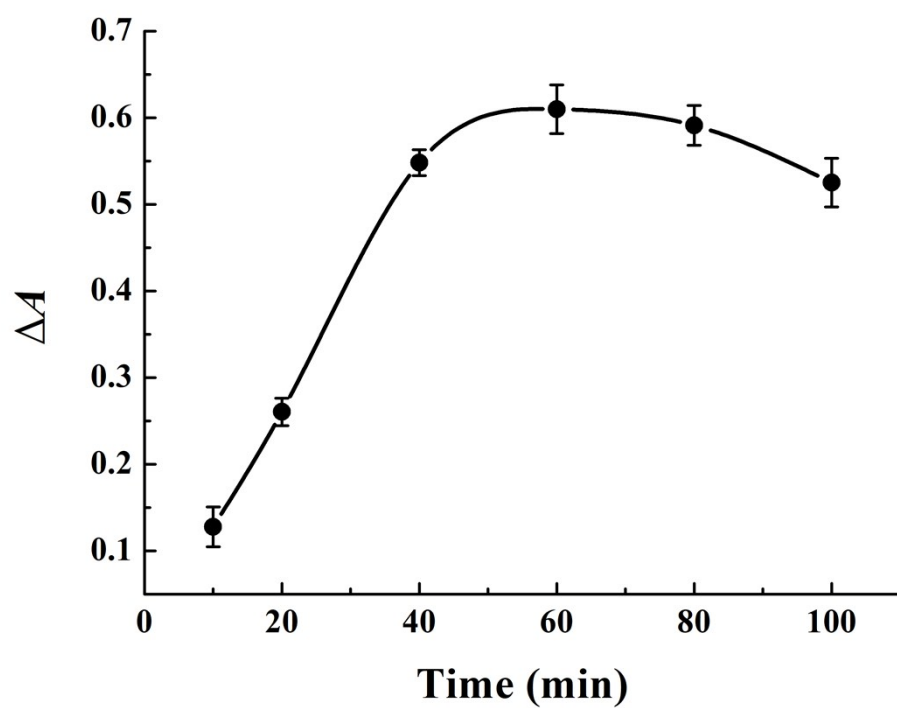

**Fig. S1.** Effect of the reaction time on the performance of the sensing system for melamine detection. Error bars were estimated from three replicate measurements.

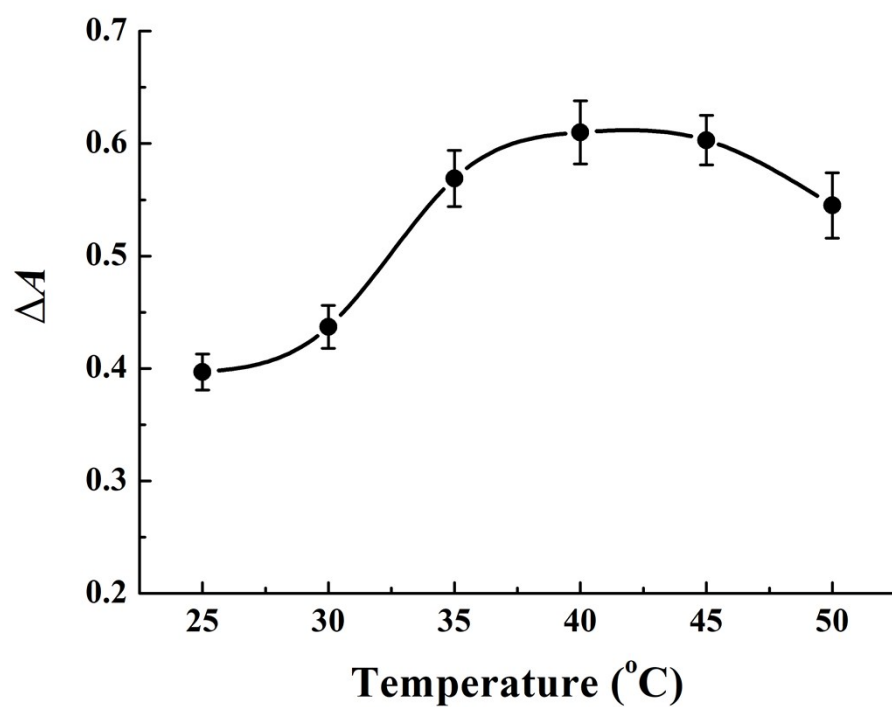

**Fig. S2.** Effect of the reaction temperature on the performance of the sensing system for melamine detection. Error bars were estimated from three replicate measurements.

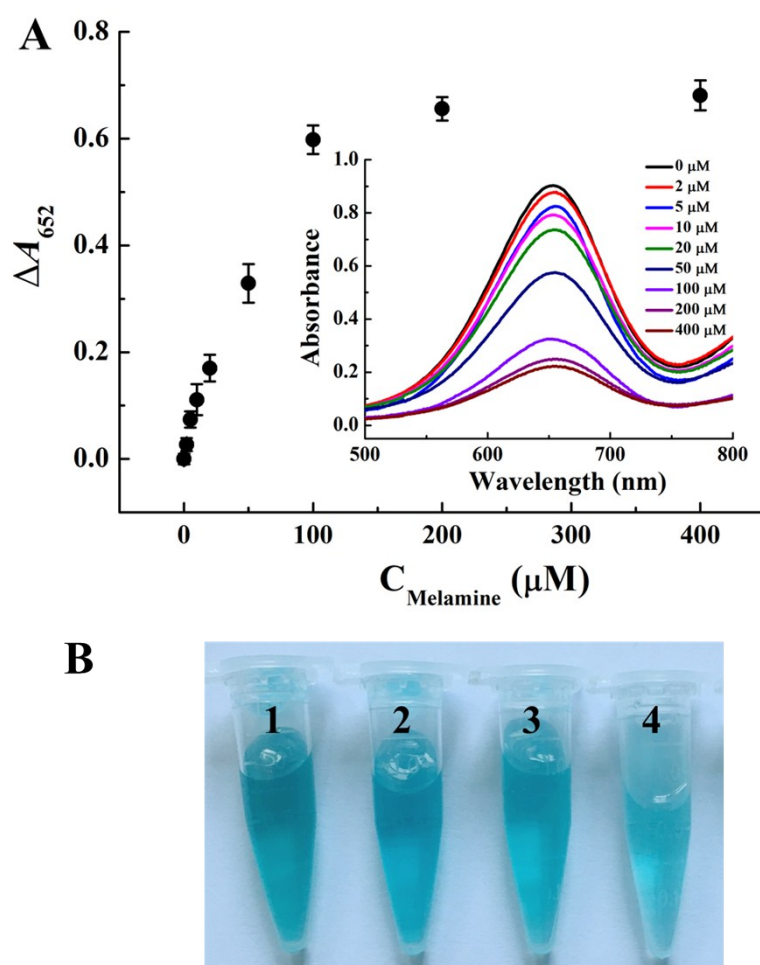

**Fig. S3.** (A) The UV-vis absorption spectra of the colorimetric sensing system for the detection of melamine in liquid milk samples. Inset: the relationship between melamine concentration and absorbance changes at 652 nm. the linear region at low melamine concentrations. Error bars were estimated from three replicate measurements. (B) Typical photographs for different concentrations of melamine in liquid milk samples, from 1 to 4 are 0, 20, 50 and 100  $\mu\text{M}$ , respectively.

**Table S1.** Comparison of the assay performance of various methods for melamine detection

| Method and materials                                                               | LOD                             | Linear range                              | Ref.      |
|------------------------------------------------------------------------------------|---------------------------------|-------------------------------------------|-----------|
| SERS (silver dendrite)                                                             | 12 $\mu\text{M}$                | 5~50 $\mu\text{M}$                        | 1         |
| SERS (AuNPs)                                                                       | 1.3 $\mu\text{M}$               | 2.5~39.7 $\mu\text{M}$                    | 2         |
| Electrochemistry (methylene blue labeled DNA Triplex Structure)                    | 0.43 nM                         | 1 nM~0.5 $\mu\text{M}$                    | 3         |
| Electrochemistry (AuNPs/rGO/GCE, potassium hexacyanoferrate(III))                  | 1.0 nM                          | 5~50 nM                                   | 4         |
| Colorimetry (DNA-SYBR Green I-TMB)                                                 | 0.5 $\mu\text{M}$               | 0.5~100 $\mu\text{M}$                     | 5         |
| Colorimetry (chromotropic acid capped Ag nanoparticles)                            | 0.036 $\mu\text{M}$             | 0.1~1.5 $\mu\text{M}$                     | 6         |
| Colorimetry (Ag nanoparticles)                                                     | 2.32 $\mu\text{M}$              | 4.0~170 $\mu\text{M}$                     | 7         |
| Colorimetry ( $\text{Fe}_3\text{O}_4$ nanoparticles- $\text{H}_2\text{O}_2$ -ABTS) | 2.0 $\mu\text{M}$               | 2.0~40.0 $\mu\text{M}$                    | 8         |
| Fluorescence (ratiometric dual-emission quantum dot)                               | 13 ng/mL (0.103 $\mu\text{M}$ ) | 50~1000 ng/mL (0.397~7.94 $\mu\text{M}$ ) | 9         |
| Fluorescence (DNA-templated silver nanoclusters)                                   | 0.1 $\mu\text{M}$               | 0.2~4.0 $\mu\text{M}$                     | 10        |
| Fluorescence (Au nanoclusters)                                                     | 0.15 $\mu\text{M}$              | 0.5~10 $\mu\text{M}$                      | 11        |
| Fluorescence (polymer-capped CdTe quantum dots)                                    | 0.6 $\mu\text{M}$               | 2.0~35 $\mu\text{M}$                      | 12        |
| Colorimetry ( $\text{Cu}^{2+}$ - $\text{H}_2\text{O}_2$ -TMB)                      | 0.5 $\mu\text{M}$               | 1~100 $\mu\text{M}$                       | This work |

## References

1. Hu YX, Feng SL, Gao F, Li-Chan ECY, Lu XN (2015) Detection of melamine in milk using molecularly imprinted polymers–surface enhanced Raman spectroscopy. Food Chem., 176:123–129.
2. Giovannozzi AM, Rolle F, Sega M, Abete MC, Marchis D, Rossia AM (2014) Rapid and sensitive detection of melamine in milk with gold nanoparticles by surface enhanced Raman scattering. Food Chem., 159:250–256.

3. Fu C, Liu C, Li Y, Guo Y, Luo F, Wang P, Guo L, Qiu B, Lin Z (2016) Homogeneous electrochemical biosensor for melamine based on DNA triplex structure and exonuclease III-assisted recycling amplification. *Anal. Chem.*, 88:10176–10182.
4. Chen N, Cheng Y, Li C, Zhang C, Zhao K, Xian Y (2015) Determination of melamine in food contact materials using an electrode modified with gold nanoparticles and reduced graphene oxide. *Microchim. Acta*, 182:1967–1975.
5. Hu H, Zhang J, Ding Y, Zhang X, Xu K, Hou X, Wu P (2017) Modulation of the singlet oxygen generation from the double strand DNA-SYBR Green I complex mediated by T-melamine-T mismatch for visual detection of melamine. *Anal. Chem.*, 89:5101–5106.
6. Song J, Wu F, Wan Y, Ma LH (2014) Visual test for melamine using silver nanoparticles modified with chromotropic acid. *Microchim. Acta*, 181:1267–1274.
7. Ping H, Zhang M, Li H, Li S, Chen Q, Sun C, Zhang T (2012) Visual detection of melamine in raw milk by label-free silver nanoparticles. *Food Control*, 23:191-197.
8. Ding N, Yan N, Ren C, Chen X (2010) Colorimetric determination of melamine in dairy products by  $\text{Fe}_3\text{O}_4$  magnetic nanoparticles- $\text{H}_2\text{O}_2$ -ABTS detection system. *Anal. Chem.*, 82:5897–5899.
9. Zhang L, Chen L (2018) Visual detection of melamine by using a ratiometric fluorescent probe consisting of a red emitting CdTe core and a green emitting CdTe shell coated with a molecularly imprinted polymer. *Microchim. Acta*, 185: 135.
10. Xie P, Zhan Y, Wu M, Guo L, Lin Z, Qiu B, Chen G, Cai ZW (2017) The detection of melamine base on a turn-on fluorescence of DNA-Ag nanoclusters. *J. Lumin.*, 186:103–108.
11. Dai H, Shi Y, Wang Y, Sun Y, Hu J, Ni P, Li Z (2014) Label-free turn-on fluorescent detection of melamine based on the anti-quenching ability of  $\text{Hg}^{2+}$  to gold nanoclusters. *Biosens. Bioelectron.*, 53:76–81.
12. Huy BT, Seo MH, Zhang X, Lee YI (2014) Selective optosensing of clenbuterol and melamine using molecularly imprinted polymer-capped CdTe quantum dots. *Biosens. Bioelectron.*, 57:310–316.
